# Supplementary material
Source: publisher figshare collection journal article supplement (https://sage.figshare.com/ndownloader/files/12371105)
Supplement: Supplementary file 1 [file 12371105]

## Supplemental Material

**Table S1.** *Conversational Purpose Coding System (here as used in Study 3)*

|                                                                                                                    | Type of conversation                   | Description                                                                                                                                                                                                                                                                                                                                                                                                                                                                                                                 |
|--------------------------------------------------------------------------------------------------------------------|----------------------------------------|-----------------------------------------------------------------------------------------------------------------------------------------------------------------------------------------------------------------------------------------------------------------------------------------------------------------------------------------------------------------------------------------------------------------------------------------------------------------------------------------------------------------------------|
| Mutually Exclusive - Only mark 1 of the 5 based on big picture of convo.<br>You can leave blank even if "talk = 1" | <i>Practical</i>                       | Conversation is about practical everyday things. The information exchanged serves a pragmatic purpose in the participant's everyday life. Can include making plans, discussing what is for dinner, picking up kids, travel arrangements. NOT CCing people on your thoughts.<br>e.g. "We need parmesan cheese for our dinner tonight"; "I will pick up Sally on Monday and Wednesdays at 5"                                                                                                                                  |
|                                                                                                                    | <i>Small Talk</i>                      | The purpose of this interaction is completely non-instrumental. No (or very trivial) information is exchanged- everything would be the same if the conversation never happened.<br>e.g. "how's the weather?" "I stepped on something" "What are you up to?"                                                                                                                                                                                                                                                                 |
|                                                                                                                    | <i>Substantive Conversation</i>        | Any conversation that has the purpose to exchange thoughts, information, values, ideas about a (NON-EMOTIONAL) topic; it could be about news of the day, about political issues, philosophical topics, theoretical ideas; information only.<br>THE CONVERSATION DOES NOT REALLY HAVE TO BE "DEEP", ONLY NEEDS TO HAVE "SUBSTANCE"<br>e.g., "Aren't Muslims not supposed to drink alcohol?"; "you heard that the WTC was attacked?"; "I found this book interesting."; "Guns n' Roses has a real rock n' roll sound to them" |
|                                                                                                                    | <i>Personal / Emotional Disclosure</i> | <b>Participant</b> is sharing his/her own personal feelings or emotions. Can include talking about their or a parent's divorce and their hopes and dreams for the future. The conversation passes a threshold of being trivial (for the participant).<br>e.g., "I feel so shitty"; "I am scared about my grades in class"; "I have a crush on x"<br>NOT accusatory statements, such as "It pisses me off when you talk with other women at parties." --> complaining                                                        |
|                                                                                                                    | <i>Gossip</i>                          | Conversation is about another person who is not present. Spreading rumor / reputational information about another person in their absence.<br>IMPORTANT: DOES NOT HAVE TO BE NEGATIVE.<br>e.g "Xxxx talked back and that's why he was fired"; "Did you hear about their break-up?"; "Frank is so silly sometimes"; "Did you hear the lead signer of Gun n' Roses is dating Xxxx?"                                                                                                                                           |

**Table S2.** *Model Fit Comparisons between Reference Model and Models Including the Moderator*

| <b>Spending time alone</b>              | <i>WAIC</i> | <i>LOOIC (SE)</i> | <i>Δ LOOIC (SE)</i> | <i>[CI<sub>95</sub>]</i> |
|-----------------------------------------|-------------|-------------------|---------------------|--------------------------|
| Reference model                         | 1344.71     | 1344.82 (30.36)   |                     |                          |
| + Extraversion                          | 1346.75     | 1346.79 (30.34)   | 1.97 0.89           | [0.23, 3.71]             |
| + Agreeableness                         | 1343.38     | 1343.42 (30.13)   | -1.40 3.82          | [-8.89, 6.09]            |
| + Conscientiousness                     | 1345.40     | 1345.44 (30.34)   | 0.62 1.98           | [-3.26, 4.50]            |
| + Neuroticism                           | 1346.98     | 1347.02 (30.41)   | 2.20 0.40           | [1.42, 2.98]             |
| + Openness                              | 1346.39     | 1346.43 (30.35)   | 1.61 1.12           | [-0.59, 3.81]            |
| <b>Talking with others</b>              | <i>WAIC</i> | <i>LOOIC (SE)</i> | <i>Δ LOOIC (SE)</i> | <i>[CI<sub>95</sub>]</i> |
| Reference model                         | 1341.91     | 1341.93 (30.79)   |                     |                          |
| + Extraversion                          | 1344.10     | 1344.14 (30.82)   | 2.21 0.63           | [0.98, 3.44]             |
| + Agreeableness                         | 1343.54     | 1343.59 (30.83)   | 1.66 1.55           | [-1.38, 4.70]            |
| + Conscientiousness                     | 1342.25     | 1342.29 (30.58)   | 0.36 1.99           | [-3.54, 4.26]            |
| + Neuroticism                           | 1343.92     | 1343.97 (30.77)   | 2.04 0.72           | [0.63, 3.45]             |
| + Openness                              | 1340.24     | 1340.31 (30.30)   | -1.62 4.23          | [-9.91, 6.67]            |
| <b>Small talk</b>                       | <i>WAIC</i> | <i>LOOIC (SE)</i> | <i>Δ LOOIC (SE)</i> | <i>[CI<sub>95</sub>]</i> |
| Reference model                         | 1358.45     | 1358.48 (29.74)   |                     |                          |
| + Extraversion                          | 1359.94     | 1359.99 (29.64)   | 1.51 1.08           | [-0.61, 3.63]            |
| + Agreeableness                         | 1360.02     | 1360.27 (29.65)   | 1.79 1.35           | [-0.86, 4.44]            |
| + Conscientiousness                     | 1360.09     | 1360.12 (29.68)   | 1.64 0.31           | [1.03, 2.25]             |
| + Neuroticism                           | 1359.47     | 1359.51 (29.64)   | 1.03 1.75           | [-2.40, 4.46]            |
| + Openness                              | 1359.96     | 1360.00 (29.72)   | 1.52 0.81           | [-0.07, 3.11]            |
| <b>Small talk (normalized)</b>          | <i>WAIC</i> | <i>LOOIC (SE)</i> | <i>Δ LOOIC (SE)</i> | <i>[CI<sub>95</sub>]</i> |
| Reference model                         | 1362.20     | 1362.23 (29.85)   |                     |                          |
| + Extraversion                          | 1364.34     | 1364.40 (29.87)   | 2.17 1.10           | [0.01, 4.33]             |
| + Agreeableness                         | 1364.08     | 1364.17 (29.70)   | 1.94 1.86           | [-1.71, 5.59]            |
| + Conscientiousness                     | 1364.11     | 1364.15 (29.83)   | 1.92 0.33           | [1.27, 2.57]             |
| + Neuroticism                           | 1363.29     | 1363.33 (29.64)   | 1.10 1.91           | [-2.64, 4.84]            |
| + Openness                              | 1360.60     | 1360.64 (29.72)   | -1.59 3.41          | [-8.27, 5.09]            |
| <b>Substantive conversation</b>         | <i>WAIC</i> | <i>LOOIC (SE)</i> | <i>Δ LOOIC (SE)</i> | <i>[CI<sub>95</sub>]</i> |
| Reference model                         | 1342.79     | 1342.82 (29.69)   |                     |                          |
| + Extraversion                          | 1344.69     | 1344.74 (29.53)   | 1.92 1.04           | [-0.12, 3.96]            |
| + Agreeableness                         | 1341.50     | 1341.54 (29.64)   | -1.28 3.10          | [-7.36, 4.80]            |
| + Conscientiousness                     | 1344.10     | 1344.14 (29.61)   | 1.32 1.18           | [-0.99, 3.63]            |
| + Neuroticism                           | 1344.48     | 1344.52 (29.69)   | 1.70 0.72           | [0.29, 3.11]             |
| + Openness                              | 1344.26     | 1344.31 (29.60)   | 1.49 1.50           | [-1.45, 4.43]            |
| <b>Substantive conversation (norm.)</b> | <i>WAIC</i> | <i>LOOIC (SE)</i> | <i>Δ LOOIC (SE)</i> | <i>[CI<sub>95</sub>]</i> |
| Reference model                         | 1356.03     | 1355.99 (29.62)   |                     |                          |
| + Extraversion                          | 1357.90     | 1357.95 (29.45)   | 1.96 1.36           | [-0.71, 4.63]            |
| + Agreeableness                         | 1356.95     | 1356.99 (29.75)   | 1.00 2.18           | [-3.27, 5.27]            |
| + Conscientiousness                     | 1357.76     | 1357.80 (29.58)   | 1.81 0.37           | [1.08, 2.54]             |
| + Neuroticism                           | 1358.10     | 1358.14 (29.63)   | 2.15 0.56           | [1.05, 3.25]             |
| + Openness                              | 1357.82     | 1357.86 (29.58)   | 1.87 0.24           | [1.40, 2.34]             |

*Note.* Pooled data from *Study 1*, *Study 2a*, *Study 3* and *Study 4* were used. Models with the moderator included (one at a time) were tested against the reference model; lower WAICs and LOOICs denote better

model fit;  $\Delta$  LOOIC = estimated difference of expected leave-one-out prediction errors and its confidence interval [CI<sub>95</sub>].

**Table S3.** *Posterior Bayesian Point Estimates and Credibility Intervals for Interaction Terms in Correlation Metric (Moderation Analyses)*

| <b>Spending time alone</b>                   | <i>PBPE</i> | <i>[CI<sub>95</sub>]</i> |
|----------------------------------------------|-------------|--------------------------|
| + Extraversion                               | -0.02       | [-0.09, 0.06]            |
| + Agreeableness                              | -0.07       | [-0.15, 0.01]            |
| + Conscientiousness                          | -0.04       | [-0.12, 0.04]            |
| + Neuroticism                                | -0.01       | [-0.08, 0.07]            |
| + Openness                                   | 0.02        | [-0.05, 0.10]            |
| <b>Talking with others</b>                   | <i>PBPE</i> | <i>[CI<sub>95</sub>]</i> |
| + Extraversion                               | 0.01        | [-0.07, 0.09]            |
| + Agreeableness                              | 0.03        | [-0.05, 0.10]            |
| + Conscientiousness                          | 0.04        | [-0.03, 0.12]            |
| + Neuroticism                                | 0.01        | [-0.06, 0.09]            |
| + Openness                                   | -0.08       | [-0.15, 0.00]            |
| <b>Small talk</b>                            | <i>PBPE</i> | <i>[CI<sub>95</sub>]</i> |
| + Extraversion                               | 0.02        | [-0.06, 0.11]            |
| + Agreeableness                              | 0.02        | [-0.05, 0.10]            |
| + Conscientiousness                          | 0.00        | [-0.07, 0.08]            |
| + Neuroticism                                | -0.04       | [-0.12, 0.04]            |
| + Openness                                   | 0.02        | [-0.06, 0.10]            |
| <b>Small talk (normalized)</b>               | <i>PBPE</i> | <i>[CI<sub>95</sub>]</i> |
| + Extraversion                               | 0.02        | [-0.06, 0.10]            |
| + Agreeableness                              | 0.03        | [-0.05, 0.11]            |
| + Conscientiousness                          | 0.00        | [-0.08, 0.08]            |
| + Neuroticism                                | -0.04       | [-0.12, 0.04]            |
| + Openness                                   | 0.07        | [0.00, 0.15]             |
| <b>Substantive conversation</b>              | <i>PBPE</i> | <i>[CI<sub>95</sub>]</i> |
| + Extraversion                               | 0.03        | [-0.11, 0.17]            |
| + Agreeableness                              | 0.14        | [-0.02, 0.29]            |
| + Conscientiousness                          | 0.05        | [-0.10, 0.20]            |
| + Neuroticism                                | -0.03       | [-0.18, 0.12]            |
| + Openness                                   | -0.05       | [-0.20, 0.10]            |
| <b>Substantive conversation (normalized)</b> | <i>PBPE</i> | <i>[CI<sub>95</sub>]</i> |
| + Extraversion                               | 0.03        | [-0.05, 0.10]            |
| + Agreeableness                              | 0.04        | [-0.03, 0.12]            |
| + Conscientiousness                          | 0.01        | [-0.07, 0.08]            |
| + Neuroticism                                | -0.01       | [-0.09, 0.07]            |
| + Openness                                   | 0.00        | [-0.08, 0.08]            |

*Note.* Pooled data from *Study 1*, *Study 2a*, *Study 3* and *Study 4* were used. Models included one moderator at a time.
